# Supplementary material for: Characterization of Potential Adverse Outcome Pathways Related to Metabolic Outcomes and Exposure to Per- and Polyfluoroalkyl Substances Using Artificial Intelligence
Source: MDPI journal article supplement (doi:10.3390/toxics10080449), 2022-08-04
Supplement: s1 [file s1]

Table S1: List of Perfluoroalkyl and Polyfluoroalkyl Substances (PFAS) as stressors

| Stressors                                                                                                                                                                                                                                                                                                                                                                                                                                                                                                                                                                                                                                                                                                                                                                                                                                                                                                                                                                                                                                                                                                                                                                                                                                                                                                                                                                                                                                                                                                                                                                                                                                                          |
|--------------------------------------------------------------------------------------------------------------------------------------------------------------------------------------------------------------------------------------------------------------------------------------------------------------------------------------------------------------------------------------------------------------------------------------------------------------------------------------------------------------------------------------------------------------------------------------------------------------------------------------------------------------------------------------------------------------------------------------------------------------------------------------------------------------------------------------------------------------------------------------------------------------------------------------------------------------------------------------------------------------------------------------------------------------------------------------------------------------------------------------------------------------------------------------------------------------------------------------------------------------------------------------------------------------------------------------------------------------------------------------------------------------------------------------------------------------------------------------------------------------------------------------------------------------------------------------------------------------------------------------------------------------------|
| <p> Perfluoro-n-butanoic acid<br/> Perfluoropentanoic acid<br/> Perfluorohexanoic acid<br/> Perfluoroheptanoic acid<br/> perfluoro-heptanesulfonate<br/> Perfluoropentanesulfonic acid<br/> Perfluorooctanoic acid<br/> Perfluorononanoic acid<br/> Perfluoro-n-decanoic acid<br/> Perfluorononanesulfonic acid<br/> Perfluoro-n-undecanoic acid<br/> Perfluorododecanoic acid<br/> Perfluoro-1-butanefulfonate<br/> perfluoro-1-decanesulfonate<br/> Perfluoro-1-hexanesulfonate<br/> Perfluorooctane sulfonic acid<br/> perfluorooctane sulfonate<br/> 2-(N-Methyl-perfluorooctane sulfanamido) acetic acid<br/> 2-(N-ethyl-perfluorooctane sulfanamido) acetic acid<br/> Perfluoro(2-ethoxy-2-fluoroethoxy)acetic acid ammonium salt<br/> Perfluorotetradecanoic acid<br/> perfluoro-n-tridecanoic acid<br/> perfluoro-n-tetradecanoic acid<br/> Krytox-H<br/> Perfluorooctanesulfonamide<br/> 2-(Perfluorohexyl)ethyl acrylate<br/> Polyfluoroalkyl phosphate mono-esters<br/> Polyfluoroalkyl phosphate di-esters<br/> Polyfluoroalkyl phosphate tri-esters<br/> 2-(Perfluoro-n-octyl)ethanol<br/> 2-(Perfluorodecyl)ethanol<br/> 2-(Perfluorooctyl)ethane-1-sulfonic acid<br/> h,1h,2h,2h-Perfluorooctanesulfonic acid<br/> Perfluoro-3,5,7,9-tetraoxadecanoic acid<br/> Perfluoro-3,5,7,9,11-pentaoxadodecanoic acid<br/> Ammonium 4,8-dioxa-3H-perfluorononanoate<br/> Nafion Byproduct 2<br/> 6:2 chlorinated polyfluorinated ether sulfonic acid<br/> Ammonium perfluoro-2-methyl-3-oxahexanoate<br/> 8:2 chlorinated polyfluorinated ether sulfonic acid<br/> Trifluoroacetate<br/> TFAA<br/> C4-C4-PFPiA<br/> Bis(nonafluorobutyl)phosphinic acid </p> |

C6-C8-PFPiA  
 Bis(perfluorohexyloctyl)phosphinic acid  
 C8-C8 PFPiA  
 Bis(perfluorooctyl)phosphinic acid  
 4-2 fluorotelomer sulfonic acid  
 3,3,4,4,5,5,6,6,6-Nonafluoro-1-hexanesulfonic acid  
 4-2 FTSA  
 Hexafluoropropylene Oxide Trimer Acid  
 HFPO-TA  
 Perfluorooctylphosphonic acid  
 2-(Perfluorohexyl)ethyl phosphonic acid  
 PFOPA  
 FL16.119  
 N-(2-methylcyclohexyl)-2,3,4,5,6-pentafluorobenzamide  
 PFECA  
 Perfluoro-1,2-propylene glycol and perfluoro-1,1-ethylene glycol, terminated with chlorohexafluoropropoxy groups; Perfluoro(2-ethoxy-ethoxy)acetic acid, ammonium salt  
 Perfluoro-2-methyl-3-oxahexanoic acid  
 PMOH  
 GenX  
 3H-perfluoro-3-(3-methoxypropoxy) propanoic acid  
 PMPP  
 ADONA  
 OBS  
 p-perfluorooxanonenoxybenzenesulfonate  
 1-Octanol, 3,3,4,4,5,5,6,6,7,7,8,8,8-tridecafluoro-  
 6-2 FTOH  
 Perfluorotributylamine  
 FC43  
 Perfluoro-3,5,7-trioxaoctanoic acid  
 PFO3OA  
 1,1,2,2-tetrafluoro-2-(1,2,2,2-tetrafluoroethoxy)ethanesulfonic acid  
 NVHOS  
 4-defluoro-3-oxa-PFPeS  
 Hydro-EVE  
 polyfluoroalkyl ether carboxylic acid  
 2,2,3,3-tetrafluoro-3-((1,1,1,2,3,3-hexafluoro-3-(1,2,2,2-tetrafluoroethoxy)propan-2-yl)oxy)propanoic acid  
 Potassium 9-chlorohexadecafluoro-3-oxanonane-1-sulfonate  
 6-2 Cl-PFESA  
 Potassium 11-chloroeicosafluoro-3-oxaundecane-1-sulfonate  
 8:2 Cl-PFESA  
 Pentafluoropropionic acid  
 N-methylperfluoro-1 octanesulphonamide 1,1,2,2,3,3,4,4,5,5,6,6,7,7,8,8,8-  
 Heptafluoro-N-methyl-1-octanesulfonamide (IUPAC)  
 n-MeFOSA  
 N-EtFOSA,  
 SULFLURAMID

N-EtFOSE  
N-MeFOSE  
PFODA  
PfHxDA

Table S2: List of biological events

| List of AOP-wiki events                                                                                                                                                                                                                                                                                                                                                                                                                                                                                                                                                                                                                                                                                                                                                                                                                                                                                                                                                                                                                                                                                                                                                                                                                                                                                                         | List of HBM4EU events                                                                                                                                                                                                                                                                                                                                                                                                                                      |
|---------------------------------------------------------------------------------------------------------------------------------------------------------------------------------------------------------------------------------------------------------------------------------------------------------------------------------------------------------------------------------------------------------------------------------------------------------------------------------------------------------------------------------------------------------------------------------------------------------------------------------------------------------------------------------------------------------------------------------------------------------------------------------------------------------------------------------------------------------------------------------------------------------------------------------------------------------------------------------------------------------------------------------------------------------------------------------------------------------------------------------------------------------------------------------------------------------------------------------------------------------------------------------------------------------------------------------|------------------------------------------------------------------------------------------------------------------------------------------------------------------------------------------------------------------------------------------------------------------------------------------------------------------------------------------------------------------------------------------------------------------------------------------------------------|
| <p>stabilization PPAR alpha co-repressor<br/>PPAR-gamma activation<br/>Increased Reactive oxygen species<br/>Increase FA Influx<br/>Activation FAS<br/>Activation Glucocorticoid Receptor<br/>Up Regulation SREBF2<br/>Up Regulation Unsaturated fatty acid<br/>Down Regulation GSS gene<br/>Down Regulation GST gene<br/>Glutathione synthesis<br/>Activation 3-hydroxy-3-methylglutaryl-CoA reductase gene<br/>Perturbation of cholesterol<br/>Glutathione homeostasis<br/>Hepatotoxicity<br/>Increase cytosolic fatty acid<br/>Inhibit serotonin transporter activity<br/>Decreased serotonin transporter activity<br/>Decreased extracellular sodium<br/>Decreased extracellular Na<sup>+</sup><br/>Decreased extracellular chloride<br/>Decreased extracellular Cl<sup>-</sup><br/>Increased extracellular serotonin<br/>Increased intracellular sodium<br/>Increased intracellular Na<sup>+</sup><br/>Increased intracellular chloride<br/>Increased intracellular Cl<sup>-</sup><br/>Decreased intracellular serotonin<br/>Decreased packaged serotonin<br/>Decreased synaptic release<br/>Increased 5-HT<sub>3</sub><br/>Increased 5-hydroxytryptamine<br/>Inactivated 5-HTR (serotonin receptors)<br/>Reduce expression BDNF<br/>Reduce expression Brain-derived neurotrophic factor<br/>Decreased neuroplasticity</p> | <p>Insulin Resistance Syndrome<br/>Syndrome X<br/>Dysmetabolic Syndrome X<br/>Metabolic Cardiovascular Syndrome<br/>Type 2 Diabetes Mellitus<br/>Insulin Sensitivity<br/>Glucose Intolerances<br/>Hyperglycemia<br/>Insulin Resistance<br/>Metabolic syndrome<br/>Dyslipidemias<br/>Dyslipoproteinemias<br/>Hyperlipidemias<br/>High Blood Pressure<br/>Hypertension<br/>Abdominal Obesity<br/>Central Obesity<br/>Liver Diseases<br/>Thyroid Diseases</p> |

|                                                                                                                                                                                                                                                                                                                                                                                                                                                                                                                                                                                                                                                                                                                                                                                                                                                                                                                                                                                                                                                                                                                                                                                                                                                                                                                                                                                                         |  |
|---------------------------------------------------------------------------------------------------------------------------------------------------------------------------------------------------------------------------------------------------------------------------------------------------------------------------------------------------------------------------------------------------------------------------------------------------------------------------------------------------------------------------------------------------------------------------------------------------------------------------------------------------------------------------------------------------------------------------------------------------------------------------------------------------------------------------------------------------------------------------------------------------------------------------------------------------------------------------------------------------------------------------------------------------------------------------------------------------------------------------------------------------------------------------------------------------------------------------------------------------------------------------------------------------------------------------------------------------------------------------------------------------------|--|
| <p>Increase cortisone<br/>Reduced BDNF<br/>Reduced Brain-derived neurotrophic factor<br/>Activation 5-HT2A (Serotonin 2A)<br/>Activate PLC<br/>Activate Phospholipase C<br/>Increase inositol triphosphate<br/>Increase intracellular calcium<br/>Activate calmodulin<br/>Increase myosin light chain phosphorylation<br/>Increase vascular smooth muscle contraction<br/>Increase hypertension<br/>Decreased extracellular serotonin<br/>NFE2/Nrf2 repression<br/>Increased steatosis<br/>Reduced FXR activity<br/>Reduced SHP activity<br/>Activated LXR<br/>Reduced PPARalpha<br/>Reduced HSD17B4 activity<br/>Reduced fatty acid beta oxidation<br/>obesity<br/>activation of CCAAT/enhancer-binding protein alpha<br/>increased adipogenesis<br/>decreased dopamine<br/>decreased reward<br/>decreased DNA methylation of tyrosine hydroxylase<br/>decreased methylation of dopamine transporter promoter<br/>chronic high fat diet<br/>Steatohepatitis<br/>Inhibition Fatty Acid Beta Oxidation<br/>Increased Oncotic Necrosis<br/>Tissue resident cell activation<br/>Increased Pro-inflammatory mediators<br/>Leukocyte recruitment<br/>Leukocyte activation<br/>Fatty Acid Beta Oxidation Decreased<br/>Endocytotic lysosomal uptake<br/>Activation LXR<br/>Damaging Mitochondria<br/>Mitochondrial dysfunction 1<br/>Decreased Mitochondrial fatty acid beta-oxidation<br/>Activation AhR</p> |  |
|---------------------------------------------------------------------------------------------------------------------------------------------------------------------------------------------------------------------------------------------------------------------------------------------------------------------------------------------------------------------------------------------------------------------------------------------------------------------------------------------------------------------------------------------------------------------------------------------------------------------------------------------------------------------------------------------------------------------------------------------------------------------------------------------------------------------------------------------------------------------------------------------------------------------------------------------------------------------------------------------------------------------------------------------------------------------------------------------------------------------------------------------------------------------------------------------------------------------------------------------------------------------------------------------------------------------------------------------------------------------------------------------------------|--|

|                                                                                                                                                                                                                                                                                                                                                                                                                                                                                                                                                                                                                                                                                                                                                                                                                                                                                                                                                                                                                                                                                                                                                                                                                                                                                                                                                                                                                                          |  |
|------------------------------------------------------------------------------------------------------------------------------------------------------------------------------------------------------------------------------------------------------------------------------------------------------------------------------------------------------------------------------------------------------------------------------------------------------------------------------------------------------------------------------------------------------------------------------------------------------------------------------------------------------------------------------------------------------------------------------------------------------------------------------------------------------------------------------------------------------------------------------------------------------------------------------------------------------------------------------------------------------------------------------------------------------------------------------------------------------------------------------------------------------------------------------------------------------------------------------------------------------------------------------------------------------------------------------------------------------------------------------------------------------------------------------------------|--|
| <p> Peptide Oxidation<br/> Decreased PCK1 expression<br/> Activation PPAR<math>\alpha</math><br/> peroxisome proliferator activated receptor<br/> promoter demethylation<br/> Alkylation Protein<br/> Activation PXR/SXR<br/> Activation SCD-1<br/> Activation SREBP-1c<br/> Activation Stellate cells<br/> Accumulation Triglyceride<br/> Accumulation Fatty acid<br/> Liver fibrosis<br/> Liver Steatosis<br/> Suppression VLDL secretion<br/> Inhibition Mitochondrial fatty acid beta-oxidation<br/> Increased Triglyceride formation<br/> Accumulation Liver lipid<br/> Suppression NR1H3<br/> Activation SREBF1<br/> Increased De Novo FA synthesis<br/> Increased Liver Steatosis<br/> Increased Liver Steatosis<br/> Suppression HNF4<math>\alpha</math><br/> Up Regulation SCD-1<br/> Up Regulation FAS<br/> Increased FA Influx<br/> Up Regulation LDLR<br/> Up Regulation low density lipoprotein receptor<br/> Increased LDL uptake<br/> Inhibition PPAR <math>\alpha</math><br/> Up Regulation Acetyl-CoA carboxylase-1<br/> Up Regulation ACC-1<br/> Inhibition FoxA2<br/> Down Regulation CPT1A<br/> Down Regulation HMGCS2<br/> Decreased Ketogenesis<br/> Activation NRF2<br/> Activation NR1H4<br/> Activation SHP<br/> Decreased DHB4/HSD17B4<br/> Activation LXR <math>\alpha</math><br/> Up Regulation CD36<br/> Cell injury<br/> Cell death<br/> Decreased Cholesterol<br/> Decreased De Novo Biosynthesis of </p> |  |
|------------------------------------------------------------------------------------------------------------------------------------------------------------------------------------------------------------------------------------------------------------------------------------------------------------------------------------------------------------------------------------------------------------------------------------------------------------------------------------------------------------------------------------------------------------------------------------------------------------------------------------------------------------------------------------------------------------------------------------------------------------------------------------------------------------------------------------------------------------------------------------------------------------------------------------------------------------------------------------------------------------------------------------------------------------------------------------------------------------------------------------------------------------------------------------------------------------------------------------------------------------------------------------------------------------------------------------------------------------------------------------------------------------------------------------------|--|

|                                                                                                                                                                                                                                                                                                                                                                                                                                                                                                                                                                                                                                                                                                                                                                                                                                                                                                                                                                                                                                                                                                                |  |
|----------------------------------------------------------------------------------------------------------------------------------------------------------------------------------------------------------------------------------------------------------------------------------------------------------------------------------------------------------------------------------------------------------------------------------------------------------------------------------------------------------------------------------------------------------------------------------------------------------------------------------------------------------------------------------------------------------------------------------------------------------------------------------------------------------------------------------------------------------------------------------------------------------------------------------------------------------------------------------------------------------------------------------------------------------------------------------------------------------------|--|
| <p>Choleseterol</p> <p>Decreased Uptake of Lipoproteins</p> <p>Decreased Transport of Cholesterol to the Inner Mitochondrial Membrane</p> <p>Decreased Testosterone Production by Adult Leydig Cells</p> <p>Decreased sperm quantity and/or quality in the adult testis</p> <p>Activation ChREBP</p> <p>Accumulation Collagen</p> <p>Up Regulation CYP1A1</p> <p>Decreased PPARalpha transactivation of gene expression</p> <p>Decreased Ketogenesis</p> <p>Decreased production of ketone bodies</p> <p>Not Increased Circulating Ketone Bodies</p> <p>Increased Catabolism of Muscle Protein</p> <p>Decreased Body Weight</p> <p>Inhibition SREBP1c</p> <p>Activation MTTP</p> <p>Increased ApoB100</p> <p>Increased Triglyceride</p> <p>Disruption Lysosome</p> <p>Synthesis De Novo FA</p> <p>S-Glutathionylation eNOS</p> <p>Uncoupling eNOS</p> <p>Depletion Nitric Oxide</p> <p>Decrease Tetrahydrobiopterin</p> <p>Decrease GTPCH-1</p> <p>Impaired Vasodilation</p> <p>Increase Vascular Resistance</p> <p>Hypertension</p> <p>Decrease AKT/eNOS activity</p> <p>Binding of antagonist PPAR alpha</p> |  |
|----------------------------------------------------------------------------------------------------------------------------------------------------------------------------------------------------------------------------------------------------------------------------------------------------------------------------------------------------------------------------------------------------------------------------------------------------------------------------------------------------------------------------------------------------------------------------------------------------------------------------------------------------------------------------------------------------------------------------------------------------------------------------------------------------------------------------------------------------------------------------------------------------------------------------------------------------------------------------------------------------------------------------------------------------------------------------------------------------------------|--|
